# Supplementary material for: Novel Insights into Selected Disease-Causing Mutations within the SLC35A1 Gene Encoding the CMP-Sialic Acid Transporter
Source: PubMed Central journal article supplement (PMC7795627; doi:10.3390/ijms22010304), 2020-12-30
Supplement: ijms-22-00304-s001.pdf [file ijms-22-00304-s001.pdf]

1 ATGGCTGCCCCGAGAGACAATGTCACCTTTATTATTCAAGTTATACTGCTTGGCAGTGATGACCCTGATGGCTGCAGTCTATAACCATAGCTTTAAGATACA  
 101 CAAGGACATCAGACAAAGAACTCTACTTTTTCAACCACAGCCGTGTGTATCACAGAAGTTATAAAGTTATTGCTAAGTGTGGGAATTTTAGCTAAAGAAAC  
 201 TGGTAGTCTGGGTAGATTCAAAGCATCTTTAAGAGAAAATGTCTTGGGGAGCCCCAAGGAACTGTTGAAGTTAAGTGTGCCATCGTTAGTGTATGCTGTT  
 301 CAGAAACAACATGGCTTTCCTAGCTCTTAGCAATCTGGATGCAGCAGTGTACCAGGTGACCTACCAGTTGAAGATTCCGTGTACTGCTTTATGCACTGTTT  
 401 TAATGTTAAACCGGACACTCAGCAAATTACAGTGGGTTTCAGTTTTTATGCTGTGTGCTGGAGTTAAGCTTGTACAGTGGAAACCAGCCCAAGCTACAAA  
 501 AGTGGTGGTGGAAACAAAATCCATTATTAGGGTTTGGCGCTATAGCTATTGCTGTATTGTGCTCAGGATTTGCAGGAGTATATTTTCAAAAAGTTTTAAAG  
 601 AGTTCAGATACTTCTCTTTGGGTGAGAAACATTCAAATGTATCTATCAGGGATTATTGTGACATTAGCTGGCGTCTACTTGTGAGATGGAGCTGAAATTA  
 701 AAGAAAAAGGATTTTTCTATGGTTACACATATTATGTCTGGTTTGTGATCTTTCTTGCAAGTGTGGTGGCCTCTACACTTCTGTTGTGGTTAAGTACAC  
 801 AGACAACATCATGAAAGGCTTTTTCTGCAGCAGCGGCCATTGTCCTTTCCACCATTGCTTCAGTAATGCTGTTTGGATTACAGATAACACTCACCTTTGCC  
 901 CTGGGTACTCTTCTTGTATGTGTTTCCATATATCTCTATGGATTACCCAGACAAGACACTACATCCATCCAACAAGGAGAAAACAGCTTCAAAGGAGAGAG  
 1001 TTATTGGTGTGTGA

**Figure S1.** Nucleotide sequence of a cDNA coding for the wild-type CST. Nucleotides that were subjected to mutations are labeled in the following colors: light-blue (c.303 G>C), purple (c.467 C>G) and dark-blue (c.586 G>A).

1 MAAPRDNVTLLFKLYCLAVMTLMAAVYTIALRYTRTSDKELYFSTTAVCI  
 51 TEVIKLLLSVGILAKETGSLGRFKASLRENVLGSPKELLKLSVPSLVYAV  
 101 QNNMAFLALSNLDAAVYQVTYQLKIPCTALCTVLMNRTLSKLQWVSVFM  
 151 LCAGVIVLVQWKPAQATKVVVEQNPLLGFGAIAIAVLCSGFAGVYFIVKVLK  
 201 SSDTSLWVRNIQMYLSGIIVTLAGVYLSDGAEIKEKGFYGYTYVWFVI  
 251 FLASVGGLYTSVVVKYTDNIMKGFSAAAIIVLSTIASVMLFGLQITLTF  
 301 LGTLLVCVSIYLYGLPRQDTTSIQQGETASKERVIGV

**Figure S2.** Amino acid sequence of the wild-type CST. Amino acids that were subjected to mutations are labeled in the following colors: light-blue (p.Q101H), purple (p.T156R) and dark-blue (p.E196K).

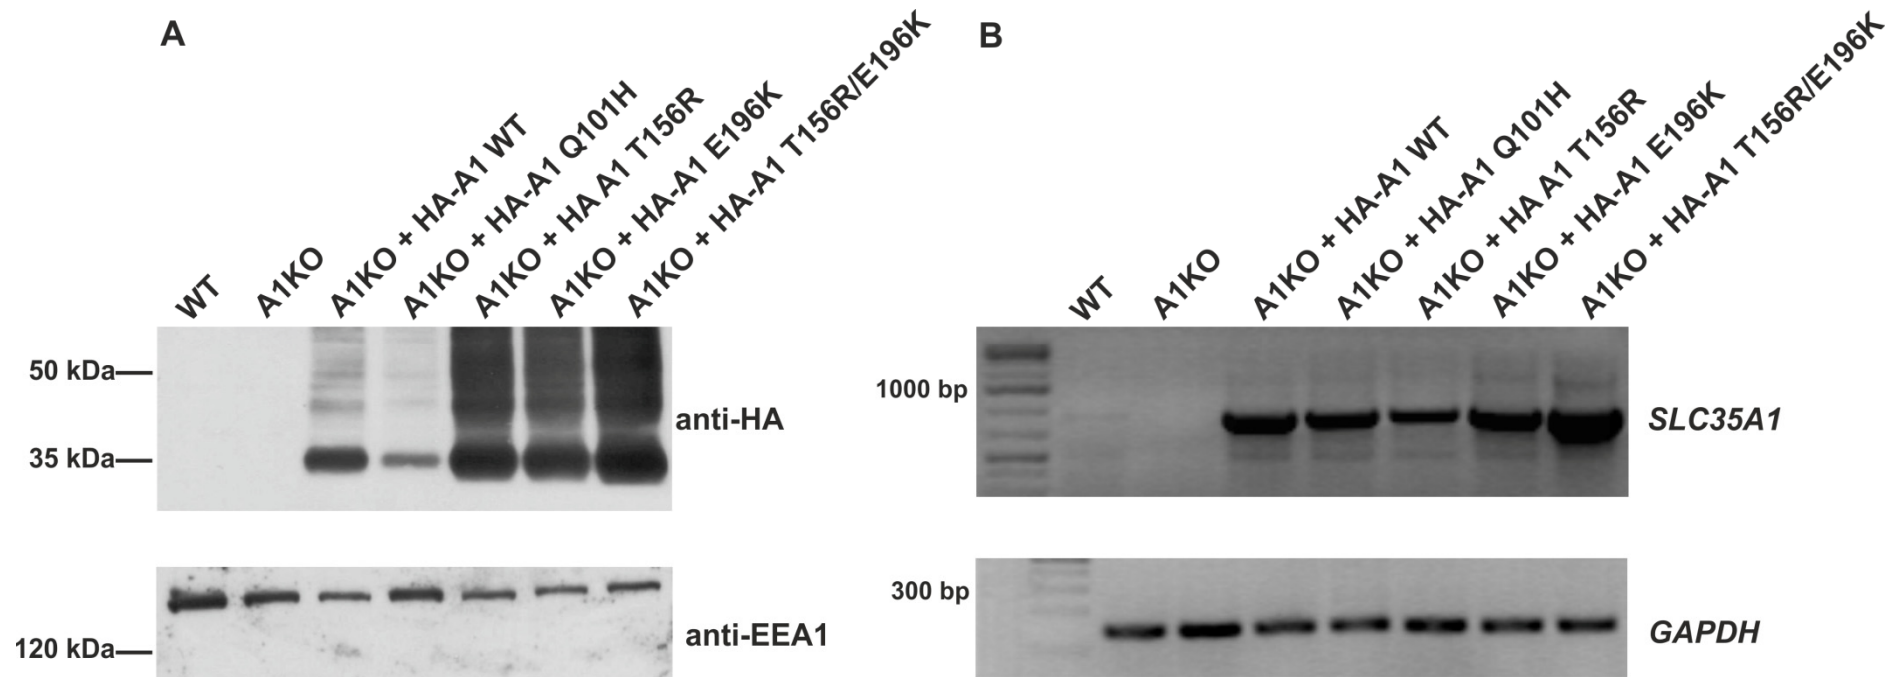

**Figure S3.** Verification of expression of CST variants in stable transfectants on protein (A) and mRNA (B) levels. (A) Whole cell lysates were separated by SDS-PAGE, resolved proteins were electrotransferred onto nitrocellulose membrane and HA-tagged CST variants were detected by Western blotting using HRP-conjugated anti-HA antibody followed by chemiluminescent detection. Early endosome antigen 1 (EEA1) was detected in parallel as a loading control. (B) Total RNA was isolated from cells, cDNA was synthesized from the mRNA template and semi-quantitative PCR was carried out using primers designed to amplify the *SLC35A1* gene (Table S1). The *GAPDH* gene was amplified in parallel as a reference using primers listed in Table S4.

**Table S1.** Primers used in RT-PCR analysis of putative *SLC35A1*-deficient clones using total RNA as a template.

| Primer name  | Primer sequence          | Product length |
|--------------|--------------------------|----------------|
| F1 crRNA 1&3 | ACTGCTTGGCAGTGATGACC     | 927 bp         |
| R2 crRNA 2   | GGATGGATGTAGTGTCTTGTCTGG |                |

**Table S2.** Primers used in PCR analysis of putative *SLC35A1*-deficient clones using genomic DNA as a template.

| Primer name   | Primer sequence           | Product length | Product localization |
|---------------|---------------------------|----------------|----------------------|
| F1 crRNA 1&3  | ACTGCTTGGCAGTGATGACC      | 351 bp         | Exon 2               |
| R2i crRNA 1&3 | CCTTGGTCTCCACCCACTAG      |                |                      |
| F2i crRNA 2   | GTGGTCAGATAGTGTGACGTTAGGC | 365 bp         | Exon 8               |
| R1 crRNA 2    | GCTGTTTCTCCTTGTGGATGG     |                |                      |

**Table S3.** Primers used in site-directed mutagenesis. Mutated nucleotides are indicated in red.

| Primer name | Primer sequence                                              | Resulting construct     | Mutated nucleotide | Mutated amino acid |
|-------------|--------------------------------------------------------------|-------------------------|--------------------|--------------------|
| F_A1_303    | CGTTAGTGTATGCTGTTCA <b>C</b> AACAACATGGCTTTCCTAGC            | pSelect-HA-SLC35A1(303) | c.303 G>C          | p.Q101H            |
| F_A1_467    | TATGCTGTGTGCTGGAGTTA <b>G</b> GCTTGTACAGTGG                  | pSelect-HA-SLC35A1(467) | c.467 C>G          | p.T156R            |
| F_A1_586    | GTGCTCAGGATTTGCAGGAGTATATTTT <b>A</b> AAAAAAGTTTTAAAGAGTTCAG | pSelect-HA-SLC35A1(586) | c.586 G>A          | p.E196K            |

**Table S4.** Primers used for amplification of the *GAPDH* gene.

| Primer name | Primer sequence      | Product length |
|-------------|----------------------|----------------|
| Forward     | AGGTCGGAGTCAACGGATTT | 192 bp         |
| Reverse     | TGACAAGCTTCCCGTTCTCA |                |

**Table S5.** NanoBiT expression plasmids obtained in this study.

| <b>Construct</b>   | <b>Forward primer</b>        | <b>Reverse primer</b>                 | <b>Backbone plasmid</b> |
|--------------------|------------------------------|---------------------------------------|-------------------------|
| N-L-A1 WT          | AAAAGAGCTCAGATGGCTGCCCCGAGAG | AAAAGAATTCTCACACACCAATAACTCTCTCCTTTGA | pBiT1.1-N[TK/LgBiT]     |
| N-S-A1 WT          | AAAAGAGCTCAGATGGCTGCCCCGAGAG | AAAAGAATTCTCACACACCAATAACTCTCTCCTTTGA | pBiT2.1-N[TK/SmBiT]     |
| N-L-A1 Q101H       | AAAAGAGCTCAGATGGCTGCCCCGAGAG | AAAAGAATTCTCACACACCAATAACTCTCTCCTTTGA | pBiT1.1-N[TK/LgBiT]     |
| N-S-A1 Q101H       | AAAAGAGCTCAGATGGCTGCCCCGAGAG | AAAAGAATTCTCACACACCAATAACTCTCTCCTTTGA | pBiT2.1-N[TK/SmBiT]     |
| N-L-A1 T156R       | AAAAGAGCTCAGATGGCTGCCCCGAGAG | AAAAGAATTCTCACACACCAATAACTCTCTCCTTTGA | pBiT1.1-N[TK/LgBiT]     |
| N-S-A1 T156R       | AAAAGAGCTCAGATGGCTGCCCCGAGAG | AAAAGAATTCTCACACACCAATAACTCTCTCCTTTGA | pBiT2.1-N[TK/SmBiT]     |
| N-L-A1 E196K       | AAAAGAGCTCAGATGGCTGCCCCGAGAG | AAAAGAATTCTCACACACCAATAACTCTCTCCTTTGA | pBiT1.1-N[TK/LgBiT]     |
| N-S-A1 E196K       | AAAAGAGCTCAGATGGCTGCCCCGAGAG | AAAAGAATTCTCACACACCAATAACTCTCTCCTTTGA | pBiT2.1-N[TK/SmBiT]     |
| N-L-A1 T156R/E196K | AAAAGAGCTCAGATGGCTGCCCCGAGAG | AAAAGAATTCTCACACACCAATAACTCTCTCCTTTGA | pBiT1.1-N[TK/LgBiT]     |
| N-S-A1 T156R/E196K | AAAAGAGCTCAGATGGCTGCCCCGAGAG | AAAAGAATTCTCACACACCAATAACTCTCTCCTTTGA | pBiT2.1-N[TK/SmBiT]     |
